# Supplementary material for: Exploring Natural Product Activity and Species Source Candidates for Hunting ABCB1 Transporter Inhibitors: An In Silico Drug Discovery Study
Source: MDPI journal article supplement (doi:10.3390/molecules27103104), 2022-05-12
Supplement: s1 [file s1]

# Exploring Natural Product Activity and Species Source Candidates for Hunting ABCB1 Transporter Inhibitors: An *In Silico* Drug Discovery Study

Mahmoud A. A. Ibrahim <sup>1,\*</sup>, Khlood A. A. Abdeljawaad <sup>1</sup>, Alaa H. M. Abdelrahman <sup>1</sup>, Laila A. Jaragh-Alhadad <sup>2</sup>, Hesham Farouk Oraby <sup>3,4</sup>, Eslam B. Elkaeed <sup>5</sup>, Gamal A. H. Mekhemer <sup>1</sup>, Gamal A. Gabr <sup>6,7</sup>, Ahmed M. Shawky <sup>8</sup>, Peter A. Sidhom <sup>9</sup>, Mahmoud E. S. Soliman <sup>10</sup>, Mahmoud F. Moustafa <sup>11,12</sup>, Paul W. Paré <sup>13</sup> and Mohamed-Elamir F. Hegazy <sup>14,\*</sup>

<sup>1</sup> Computational Chemistry Laboratory, Chemistry Department, Faculty of Science, Minia University, Minia 61519, Egypt; kh.abdeljawaad@compchem.net (K.A.A.A.); a.abdelrahman@compchem.net (A.H.M.A.); gmekhemer@mu.edu.eg (G.A.H.M.)

<sup>2</sup> Department of Chemistry, Faculty of Science, Kuwait University, Safat 13060, Kuwait; laila.alhadad@ku.edu.kw

<sup>3</sup> Deanship of Scientific Research, Umm Al-Qura University, Makkah 21955, Saudi Arabia; hforaby@uqu.edu.sa

<sup>4</sup> Department of Crop Science, Faculty of Agriculture, Zagazig University, Zagazig 44519, Egypt

<sup>5</sup> Department of Pharmaceutical Sciences, College of Pharmacy, AlMaarefa University, Riyadh 13713, Saudi Arabia; ikaeed@mcst.edu.sa

<sup>6</sup> Department of Pharmacology and Toxicology, College of Pharmacy, Prince Sattam Bin Abdulaziz University, Al-Kharj 11942, Saudi Arabia; g.gabr@psau.edu.sa

<sup>7</sup> Agricultural Genetic Engineering Research Institute (AGERI), Agricultural Research Center, Giza 12619, Egypt

<sup>8</sup> Science and Technology Unit (STU), Umm Al-Qura University, Makkah 21955, Saudi Arabia; amesmail@uqu.edu.sa

<sup>9</sup> Department of Pharmaceutical Chemistry, Faculty of Pharmacy, Tanta University, Tanta 31527, Egypt; peter.ayoub@pharm.tanta.edu.eg

<sup>10</sup> Molecular Bio-Computation and Drug Design Research Group, School of Health Sciences, University of KwaZulu-Natal, Westville, Durban 4000, South Africa; soliman@ukzn.ac.za

<sup>11</sup> Department of Biology, College of Science, King Khalid University, Abha 9004, Saudi Arabia; mfmostfa@kku.edu.sa

<sup>12</sup> Department of Botany and Microbiology, Faculty of Science, South Valley University, Qena 83523, Egypt

<sup>13</sup> Department of Chemistry & Biochemistry, Texas Tech University, Lubbock, TX 79409, USA; paul.pare@ttu.edu

<sup>14</sup> Chemistry of Medicinal Plants Department, National Research Centre, 33 El-Bohouth St., Dokki, Giza 12622, Egypt

\* Correspondence: m.ibrahim@compchem.net (M.A.A.I.); mohegazy@uni-mainz.de (M.-E. F. H.)

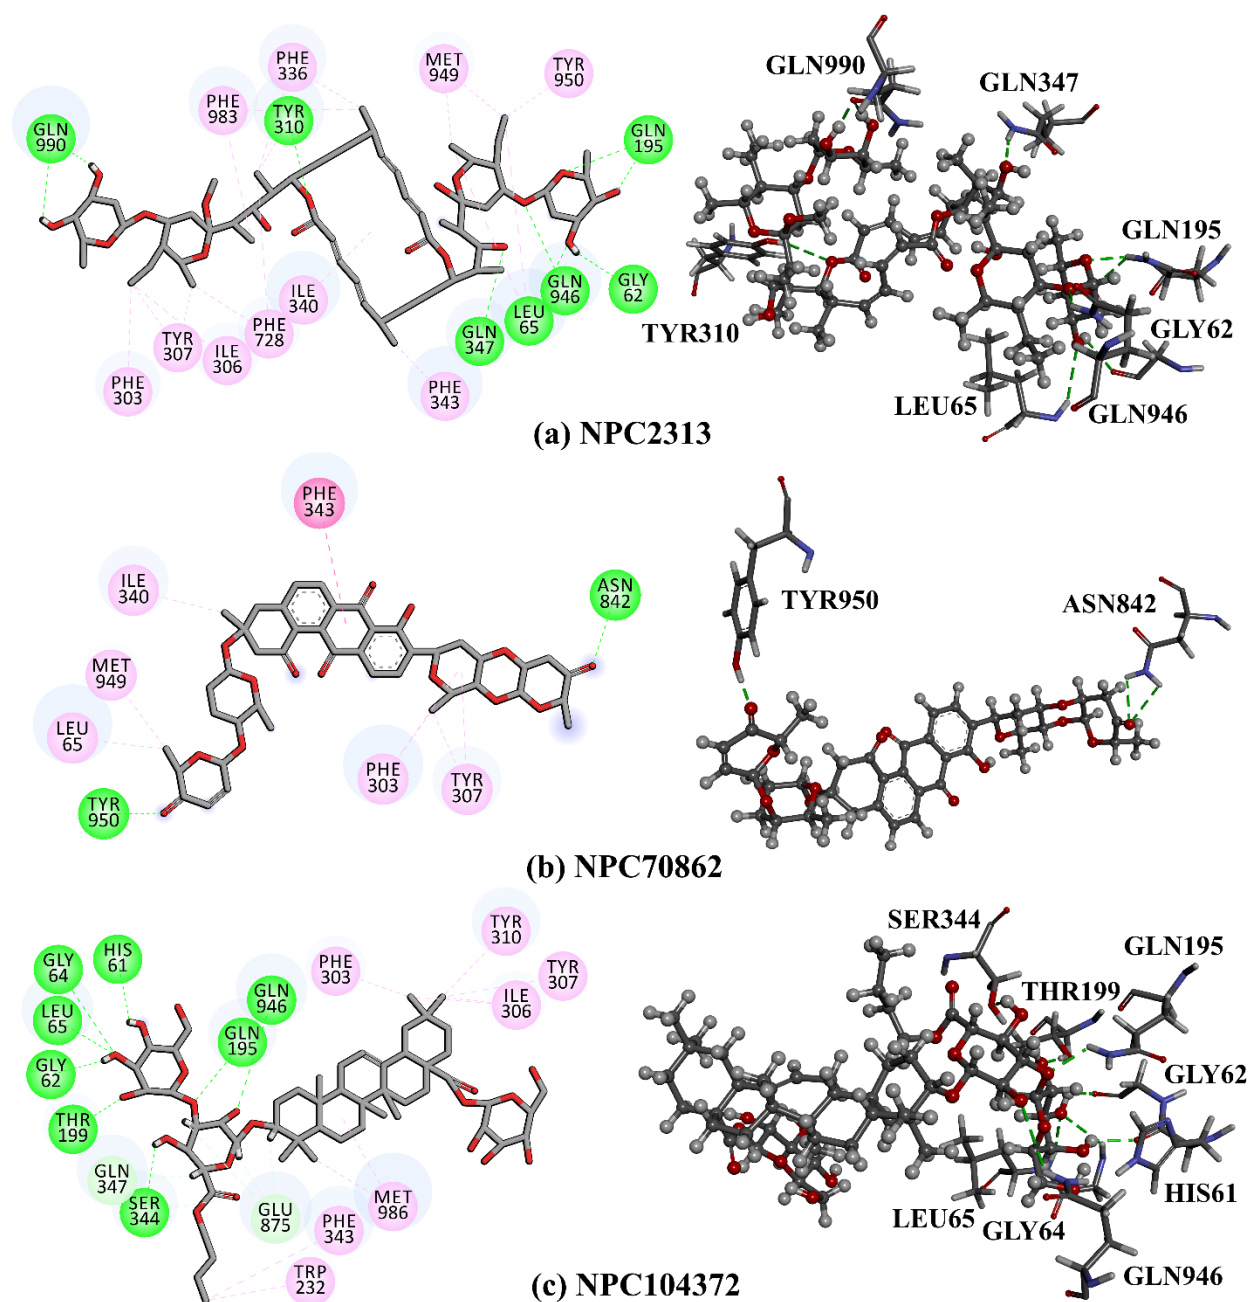

**Figure S1.** 3D and 2D representations of the binding modes of the nine potent molecules and taxol complexed with ABCB1 transporter.

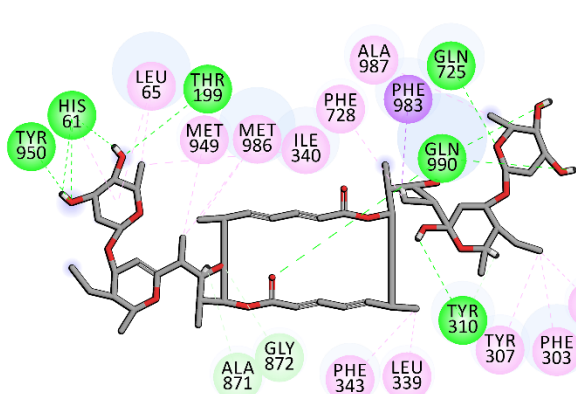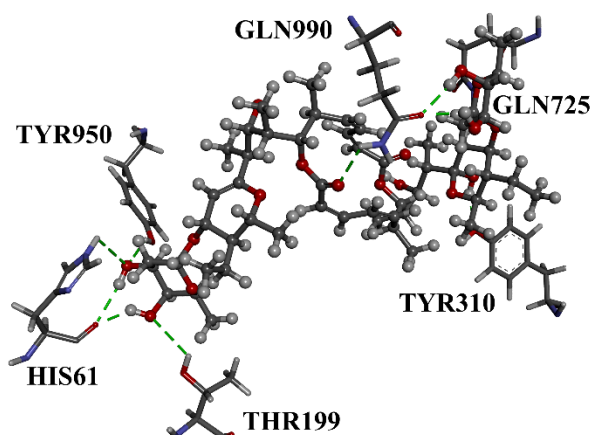

(d) NPC197736

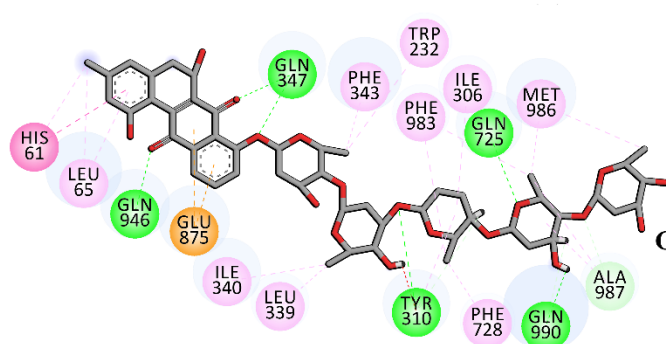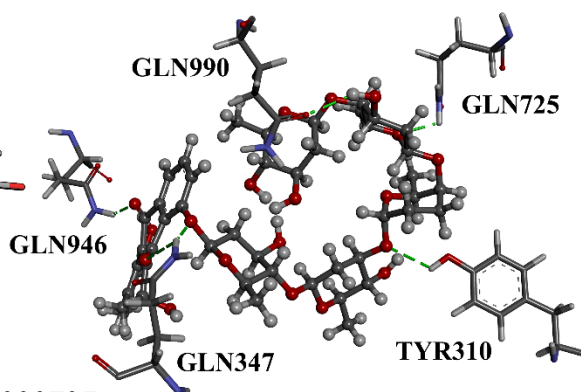

(e) NPC223735

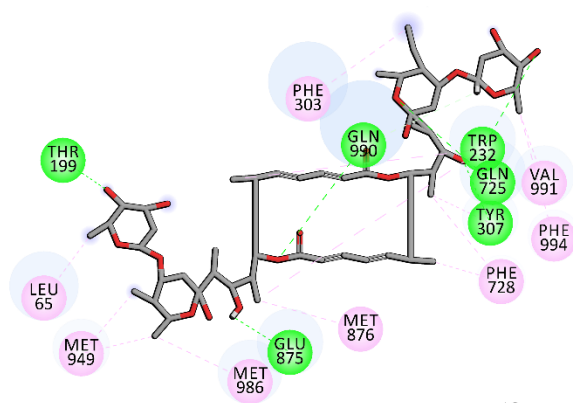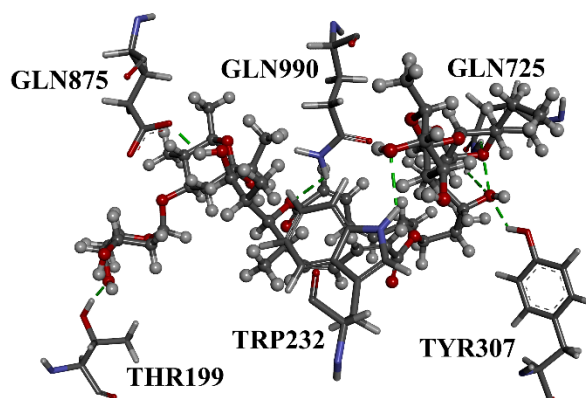

(f) NPC471637

Figure S1. Continued.

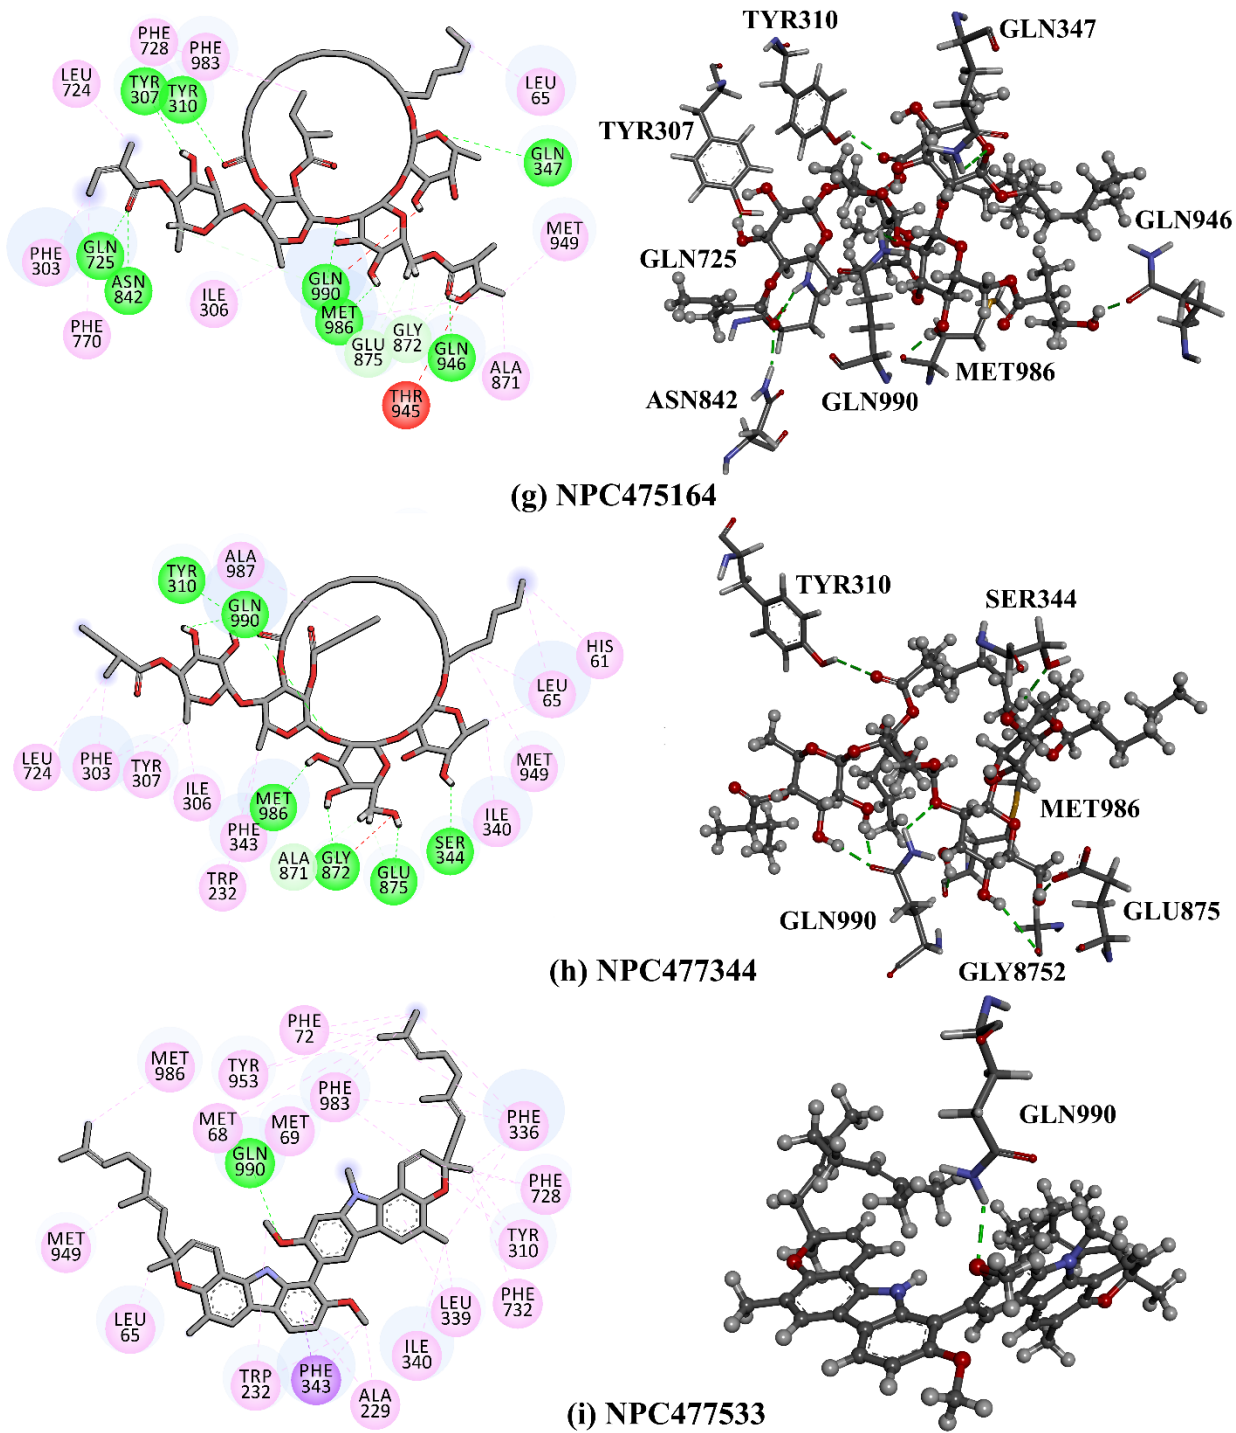**Figure S1.** *Continued.*

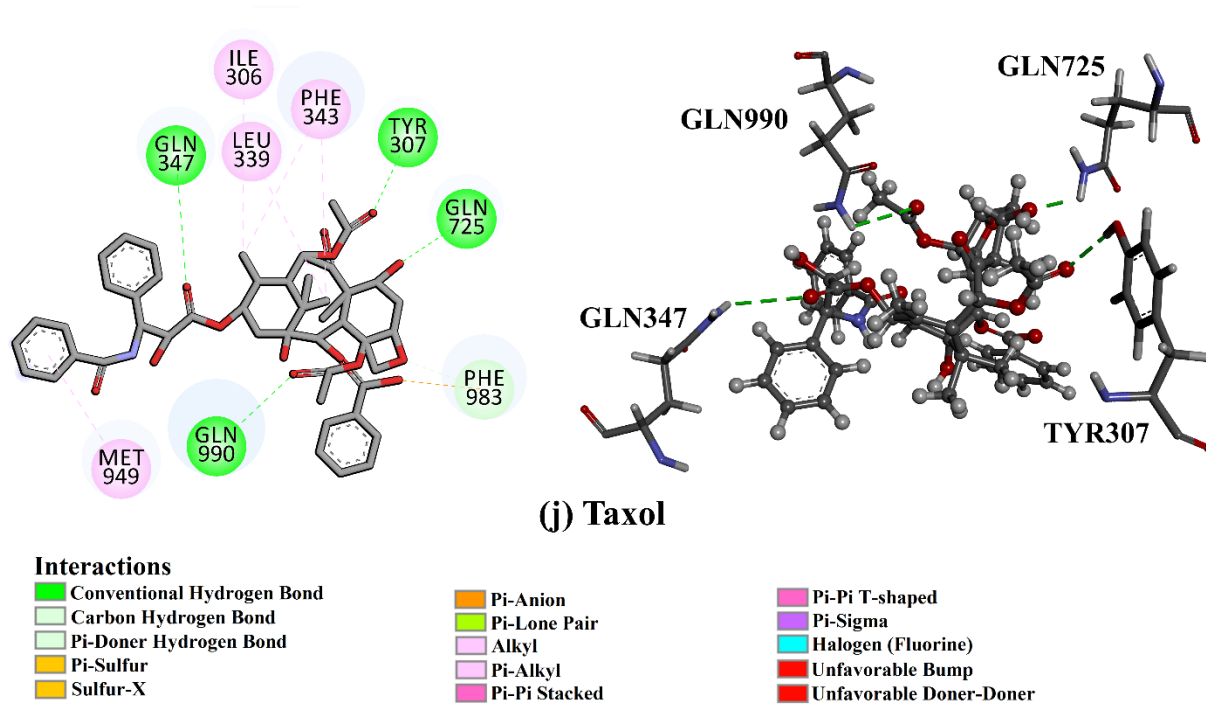Figure S1. *Continued.*

**Table S1.** Estimated fast, moderate, and expensive docking scores for taxol and the top 866 potent NPASS compounds within the ABCB1 binding pocket.<sup>a</sup>

| No. | Compound Name/Code | Docking Score (kcal/mol) |          |           | No. | Compound Name/Code | Docking Score (kcal/mol) |          |           |
|-----|--------------------|--------------------------|----------|-----------|-----|--------------------|--------------------------|----------|-----------|
|     |                    | Fast                     | Moderate | Expensive |     |                    | Fast                     | Moderate | Expensive |
|     | Taxol              | -9.4                     | -8.0     | -10.2     | 56  | NPC472937          | -10.3                    | -11.4    | -12.1     |
| 1   | NPC276231          | -15.1                    | -15.9    | -16.4     | 57  | NPC469671          | -10.3                    | -11.8    | -12.1     |
| 2   | NPC470601          | -9.6                     | -13.0    | -14.9     | 58  | NPC475655          | -9.6                     | -11.1    | -12.1     |
| 3   | NPC470602          | -10.9                    | -13.0    | -14.7     | 59  | NPC473612          | -11.7                    | -12.0    | -12.0     |
| 4   | NPC472437          | -13.5                    | -12.9    | -14.5     | 60  | NPC329943          | -11.4                    | -11.8    | -12.0     |
| 5   | NPC242269          | -13.2                    | -14.1    | -14.2     | 61  | NPC36754           | -12.0                    | -12.0    | -12.0     |
| 6   | NPC475493          | -13.4                    | -13.7    | -13.8     | 62  | NPC127197          | -12.0                    | -12.0    | -12.0     |
| 7   | NPC197736          | -8.8                     | -10.9    | -13.5     | 63  | NPC270958          | -10.2                    | -11.4    | -12.0     |
| 8   | NPC477533          | -11.1                    | -12.6    | -13.3     | 64  | NPC81137           | -8.8                     | -11.9    | -12.0     |
| 9   | NPC202104          | -12.6                    | -13.5    | -13.2     | 65  | NPC472936          | -10.6                    | -11.5    | -12.0     |
| 10  | NPC208258          | -8.4                     | -12.1    | -13.1     | 66  | NPC143173          | -12.0                    | -12.0    | -12.0     |
| 11  | NPC231271          | -12.4                    | -12.6    | -12.9     | 67  | NPC2313            | -9.7                     | -12.1    | -12.0     |
| 12  | NPC472395          | -11.9                    | -12.1    | -12.9     | 68  | NPC477874          | -11.7                    | -11.8    | -12.0     |
| 13  | NPC473507          | -10.1                    | -11.5    | -12.9     | 69  | NPC471858          | -11.5                    | -11.5    | -11.9     |
| 14  | NPC470426          | -12.8                    | -12.8    | -12.8     | 70  | NPC471863          | -12.1                    | -11.9    | -11.9     |
| 15  | NPC224528          | -12.3                    | -12.6    | -12.8     | 71  | NPC96605           | -8.5                     | -10.6    | -11.9     |
| 16  | NPC6702            | -12.0                    | -12.5    | -12.7     | 72  | NPC473547          | -11.9                    | -11.9    | -11.9     |
| 17  | NPC475258          | -12.7                    | -12.7    | -12.7     | 73  | NPC472934          | -10.7                    | -11.3    | -11.9     |
| 18  | NPC65118           | -12.2                    | -12.7    | -12.6     | 74  | NPC473720          | -11.8                    | -11.9    | -11.9     |
| 19  | NPC477207          | -11.9                    | -12.5    | -12.6     | 75  | NPC474581          | -10.6                    | -11.6    | -11.9     |
| 20  | NPC223735          | -9.9                     | -11.4    | -12.6     | 76  | NPC477344          | -10.2                    | -11.1    | -11.9     |
| 21  | NPC471850          | -10.7                    | -12.0    | -12.6     | 77  | NPC78159           | -11.3                    | -11.0    | -11.9     |
| 22  | NPC126676          | -11.8                    | -11.6    | -12.5     | 78  | NPC475164          | -9.3                     | -11.3    | -11.9     |
| 23  | NPC183736          | -10.9                    | -12.3    | -12.5     | 79  | NPC47905           | -10.8                    | -12.2    | -11.9     |
| 24  | NPC74086           | -10.5                    | -10.8    | -12.5     | 80  | NPC202428          | -11.2                    | -11.8    | -11.9     |
| 25  | NPC471860          | -11.9                    | -12.1    | -12.5     | 81  | NPC475520          | -11.9                    | -11.8    | -11.9     |
| 26  | NPC123859          | -10.1                    | -12.1    | -12.5     | 82  | NPC475570          | -11.7                    | -11.8    | -11.8     |
| 27  | NPC307205          | -12.4                    | -12.4    | -12.4     | 83  | NPC94531           | -11.0                    | -11.5    | -11.8     |
| 28  | NPC327962          | -12.2                    | -12.7    | -12.4     | 84  | NPC471583          | -11.8                    | -11.8    | -11.8     |
| 29  | NPC472236          | -11.2                    | -12.4    | -12.4     | 85  | NPC322800          | -11.2                    | -11.8    | -11.8     |
| 30  | NPC473403          | -10.5                    | -12.3    | -12.4     | 86  | NPC9856            | -11.8                    | -11.8    | -11.8     |
| 31  | NPC133209          | -10.8                    | -11.5    | -12.3     | 87  | NPC245756          | -11.7                    | -11.8    | -11.8     |
| 32  | NPC469447          | -12.1                    | -12.4    | -12.3     | 88  | NPC471382          | -11.8                    | -11.8    | -11.8     |
| 33  | NPC471859          | -12.1                    | -12.3    | -12.3     | 89  | NPC471891          | -11.8                    | -11.8    | -11.8     |
| 34  | NPC69383           | -10.9                    | -11.5    | -12.3     | 90  | NPC321661          | -11.2                    | -11.7    | -11.8     |
| 35  | NPC231712          | -9.3                     | -12.1    | -12.3     | 91  | NPC475197          | -10.4                    | -10.4    | -11.8     |
| 36  | NPC239990          | -11.9                    | -12.3    | -12.2     | 92  | NPC119068          | -9.6                     | -11.7    | -11.8     |
| 37  | NPC472939          | -10.4                    | -11.9    | -12.2     | 93  | NPC229234          | -10.6                    | -11.1    | -11.8     |
| 38  | NPC250835          | -12.2                    | -12.2    | -12.2     | 94  | NPC476451          | -11.8                    | -11.8    | -11.8     |
| 39  | NPC471637          | -9.7                     | -11.4    | -12.2     | 95  | NPC284888          | -11.7                    | -11.8    | -11.8     |
| 40  | NPC104372          | -9.9                     | -11.0    | -12.2     | 96  | NPC471053          | -9.5                     | -11.5    | -11.8     |
| 41  | NPC313179          | -10.9                    | -10.4    | -12.2     | 97  | NPC476517          | -11.3                    | -11.7    | -11.7     |
| 42  | NPC4638            | -12.2                    | -11.5    | -12.2     | 98  | NPC279442          | -9.3                     | -11.7    | -11.7     |
| 43  | NPC162440          | -12.2                    | -12.2    | -12.2     | 99  | NPC273755          | -9.7                     | -10.4    | -11.7     |
| 44  | NPC65034           | -11.9                    | -12.1    | -12.2     | 100 | NPC477873          | -11.2                    | -11.4    | -11.7     |
| 45  | NPC177362          | -12.0                    | -12.1    | -12.2     | 101 | NPC48992           | -11.4                    | -11.6    | -11.7     |
| 46  | NPC70862           | -11.6                    | -11.8    | -12.2     | 102 | NPC57586           | -8.7                     | -10.7    | -11.7     |
| 47  | NPC208011          | -11.0                    | -10.9    | -12.1     | 103 | NPC301941          | -11.8                    | -11.9    | -11.7     |
| 48  | NPC266545          | -11.0                    | -10.9    | -12.1     | 104 | NPC63047           | -11.7                    | -11.7    | -11.7     |
| 49  | NPC470582          | -10.3                    | -10.5    | -12.1     | 105 | NPC172311          | -10.2                    | -11.6    | -11.7     |
| 50  | NPC472371          | -12.4                    | -12.6    | -12.1     | 106 | NPC286994          | -11.6                    | -11.7    | -11.7     |
| 51  | NPC313421          | -10.5                    | -12.1    | -12.1     | 107 | NPC472807          | -10.9                    | -11.7    | -11.7     |
| 52  | NPC477531          | -11.0                    | -12.1    | -12.1     | 108 | NPC473575          | -9.5                     | -11.2    | -11.7     |
| 53  | NPC103250          | -12.0                    | -12.1    | -12.1     | 109 | NPC168135          | -10.3                    | -10.7    | -11.7     |
| 54  | NPC149962          | -10.8                    | -10.8    | -12.1     | 110 | NPC24599           | -11.7                    | -11.7    | -11.7     |
| 55  | NPC105942          | -11.5                    | -12.0    | -12.1     | 111 | NPC123319          | -11.1                    | -11.5    | -11.7     |

Table S1. Continued.

| No. | Compound Name/Code | Docking Score (kcal/mol) |          |           | No. | Compound Name/Code | Docking Score (kcal/mol) |          |           |
|-----|--------------------|--------------------------|----------|-----------|-----|--------------------|--------------------------|----------|-----------|
|     |                    | Fast                     | Moderate | Expensive |     |                    | Fast                     | Moderate | Expensive |
| 112 | NPC34580           | -10.9                    | -11.7    | -11.7     | 171 | NPC475544          | -9.9                     | -10.9    | -11.4     |
| 113 | NPC473398          | -11.6                    | -11.6    | -11.7     | 172 | NPC191863          | -11.0                    | -11.4    | -11.4     |
| 114 | NPC475658          | -11.7                    | -11.7    | -11.7     | 173 | NPC304307          | -10.3                    | -10.5    | -11.4     |
| 115 | NPC477065          | -11.5                    | -11.6    | -11.7     | 174 | NPC474181          | -11.4                    | -11.4    | -11.4     |
| 116 | NPC252133          | -10.7                    | -11.5    | -11.6     | 175 | NPC168188          | -9.4                     | -11.4    | -11.4     |
| 117 | NPC292706          | -8.9                     | -11.6    | -11.6     | 176 | NPC191193          | -10.0                    | -10.8    | -11.4     |
| 118 | NPC325032          | -10.1                    | -11.6    | -11.6     | 177 | NPC471861          | -11.1                    | -11.5    | -11.4     |
| 119 | NPC472574          | -9.2                     | -11.4    | -11.6     | 178 | NPC473469          | -9.3                     | -10.8    | -11.4     |
| 120 | NPC472694          | -9.8                     | -10.9    | -11.6     | 179 | NPC478124          | -11.1                    | -11.4    | -11.4     |
| 121 | NPC40455           | -11.0                    | -11.6    | -11.6     | 180 | NPC223242          | -9.8                     | -11.4    | -11.4     |
| 122 | NPC469507          | -11.5                    | -11.6    | -11.6     | 181 | NPC251226          | -10.5                    | -11.4    | -11.4     |
| 123 | NPC471782          | -11.5                    | -11.6    | -11.6     | 182 | NPC472803          | -11.0                    | -11.3    | -11.4     |
| 124 | NPC472027          | -11.6                    | -11.6    | -11.6     | 183 | NPC474585          | -9.2                     | -11.4    | -11.4     |
| 125 | NPC24748           | -11.6                    | -11.6    | -11.6     | 184 | NPC8369            | -11.2                    | -11.4    | -11.4     |
| 126 | NPC249342          | -11.6                    | -11.6    | -11.6     | 185 | NPC40496           | -10.8                    | -11.2    | -11.4     |
| 127 | NPC475561          | -11.5                    | -11.6    | -11.6     | 186 | NPC6576            | -9.9                     | -10.7    | -11.4     |
| 128 | NPC229160          | -11.0                    | -11.5    | -11.6     | 187 | NPC104910          | -8.6                     | -11.3    | -11.3     |
| 129 | NPC290534          | -11.7                    | -11.9    | -11.6     | 188 | NPC160415          | -10.5                    | -11.3    | -11.3     |
| 130 | NPC475138          | -10.4                    | -11.4    | -11.6     | 189 | NPC201244          | -11.3                    | -11.4    | -11.3     |
| 131 | NPC53520           | -11.1                    | -11.9    | -11.6     | 190 | NPC318282          | -10.6                    | -11.2    | -11.3     |
| 132 | NPC157311          | -11.0                    | -11.5    | -11.6     | 191 | NPC472235          | -11.3                    | -11.3    | -11.3     |
| 133 | NPC25316           | -11.4                    | -11.5    | -11.6     | 192 | NPC100390          | -11.4                    | -11.4    | -11.3     |
| 134 | NPC475367          | -11.3                    | -11.5    | -11.6     | 193 | NPC473881          | -9.6                     | -10.7    | -11.3     |
| 135 | NPC280385          | -8.7                     | -10.8    | -11.5     | 194 | NPC133775          | -11.1                    | -10.6    | -11.3     |
| 136 | NPC43213           | -11.4                    | -11.5    | -11.5     | 195 | NPC271607          | -10.6                    | -11.2    | -11.3     |
| 137 | NPC197357          | -8.7                     | -12.2    | -11.5     | 196 | NPC329833          | -11.2                    | -11.2    | -11.3     |
| 138 | NPC209058          | -11.5                    | -11.5    | -11.5     | 197 | NPC470765          | -10.3                    | -11.2    | -11.3     |
| 139 | NPC469312          | -11.4                    | -11.5    | -11.5     | 198 | NPC471506          | -11.3                    | -11.3    | -11.3     |
| 140 | NPC475196          | -9.8                     | -11.1    | -11.5     | 199 | NPC471654          | -11.5                    | -11.2    | -11.3     |
| 141 | NPC89923           | -11.2                    | -11.4    | -11.5     | 200 | NPC473490          | -9.1                     | -10.4    | -11.3     |
| 142 | NPC41129           | -10.0                    | -11.4    | -11.5     | 201 | NPC477209          | -11.3                    | -11.3    | -11.3     |
| 143 | NPC320801          | -11.2                    | -11.3    | -11.5     | 202 | NPC471856          | -11.3                    | -11.3    | -11.3     |
| 144 | NPC477292          | -10.3                    | -10.8    | -11.5     | 203 | NPC8761            | -10.1                    | -11.3    | -11.3     |
| 145 | NPC11242           | -8.9                     | -10.9    | -11.5     | 204 | NPC14468           | -10.6                    | -11.2    | -11.3     |
| 146 | NPC203486          | -9.1                     | -11.3    | -11.5     | 205 | NPC157333          | -10.3                    | -11.3    | -11.3     |
| 147 | NPC223301          | -10.1                    | -11.2    | -11.5     | 206 | NPC293164          | -11.3                    | -11.3    | -11.3     |
| 148 | NPC232130          | -11.5                    | -11.5    | -11.5     | 207 | NPC301556          | -9.9                     | -10.4    | -11.3     |
| 149 | NPC166492          | -11.2                    | -11.2    | -11.5     | 208 | NPC475834          | -11.3                    | -11.3    | -11.3     |
| 150 | NPC475165          | -11.5                    | -11.5    | -11.5     | 209 | NPC124296          | -8.5                     | -10.6    | -11.3     |
| 151 | NPC243981          | -10.3                    | -11.3    | -11.5     | 210 | NPC145553          | -11.2                    | -11.3    | -11.3     |
| 152 | NPC470015          | -10.7                    | -11.2    | -11.5     | 211 | NPC257269          | -8.3                     | -11.0    | -11.3     |
| 153 | NPC476958          | -11.5                    | -11.5    | -11.5     | 212 | NPC108072          | -9.8                     | -10.4    | -11.3     |
| 154 | NPC475424          | -11.3                    | -11.5    | -11.5     | 213 | NPC188291          | -11.3                    | -11.3    | -11.3     |
| 155 | NPC475913          | -11.5                    | -11.5    | -11.5     | 214 | NPC31097           | -11.2                    | -11.3    | -11.3     |
| 156 | NPC187456          | -11.3                    | -11.1    | -11.5     | 215 | NPC136922          | -9.7                     | -10.8    | -11.3     |
| 157 | NPC326264          | -8.7                     | -10.5    | -11.5     | 216 | NPC473923          | -10.2                    | -11.4    | -11.3     |
| 158 | NPC477959          | -10.3                    | -11.3    | -11.4     | 217 | NPC27541           | -9.5                     | -11.2    | -11.3     |
| 159 | NPC112274          | -8.6                     | -12.4    | -11.4     | 218 | NPC314083          | -8.4                     | -10.8    | -11.3     |
| 160 | NPC475288          | -11.4                    | -11.4    | -11.4     | 219 | NPC51662           | -9.8                     | -11.2    | -11.3     |
| 161 | NPC171148          | -8.1                     | -11.3    | -11.4     | 220 | NPC8102            | -11.0                    | -11.2    | -11.3     |
| 162 | NPC300183          | -9.7                     | -11.4    | -11.4     | 221 | NPC79193           | -11.4                    | -11.3    | -11.2     |
| 163 | NPC477208          | -11.4                    | -11.4    | -11.4     | 222 | NPC473938          | -11.1                    | -11.2    | -11.2     |
| 164 | NPC297617          | -10.5                    | -11.4    | -11.4     | 223 | NPC81175           | -11.2                    | -10.7    | -11.2     |
| 165 | NPC470753          | -10.4                    | -10.4    | -11.4     | 224 | NPC131273          | -10.5                    | -11.2    | -11.2     |
| 166 | NPC11266           | -10.5                    | -10.6    | -11.4     | 225 | NPC42673           | -11.1                    | -11.2    | -11.2     |
| 167 | NPC181298          | -10.1                    | -11.4    | -11.4     | 226 | NPC112819          | -10.8                    | -11.2    | -11.2     |
| 168 | NPC270498          | -10.4                    | -11.0    | -11.4     | 227 | NPC264192          | -11.2                    | -11.3    | -11.2     |
| 169 | NPC321496          | -11.1                    | -11.4    | -11.4     | 228 | NPC329080          | -8.0                     | -11.2    | -11.2     |
| 170 | NPC44805           | -9.5                     | -11.4    | -11.4     | 229 | NPC121647          | -10.6                    | -10.7    | -11.2     |

Table S1. Continued.

| No. | Compound Name/Code | Docking Score (kcal/mol) |          |           | No. | Compound Name/Code | Docking Score (kcal/mol) |          |           |
|-----|--------------------|--------------------------|----------|-----------|-----|--------------------|--------------------------|----------|-----------|
|     |                    | Fast                     | Moderate | Expensive |     |                    | Fast                     | Moderate | Expensive |
| 230 | NPC195239          | -11.2                    | -11.2    | -11.2     | 289 | NPC139774          | -10.6                    | -11.0    | -11.0     |
| 231 | NPC471825          | -11.0                    | -11.2    | -11.2     | 290 | NPC152850          | -11.1                    | -11.0    | -11.0     |
| 232 | NPC69408           | -11.0                    | -11.2    | -11.2     | 291 | NPC259350          | -9.7                     | -11.0    | -11.0     |
| 233 | NPC86257           | -11.1                    | -11.2    | -11.2     | 292 | NPC473565          | -10.8                    | -10.9    | -11.0     |
| 234 | NPC17810           | -11.0                    | -11.6    | -11.2     | 293 | NPC118086          | -9.2                     | -11.1    | -11.0     |
| 235 | NPC197972          | -8.8                     | -11.2    | -11.2     | 294 | NPC40574           | -10.9                    | -11.0    | -11.0     |
| 236 | NPC247219          | -10.9                    | -11.2    | -11.2     | 295 | NPC469561          | -10.1                    | -10.7    | -11.0     |
| 237 | NPC469810          | -10.5                    | -10.9    | -11.2     | 296 | NPC475248          | -11.0                    | -11.0    | -11.0     |
| 238 | NPC470280          | -11.2                    | -10.6    | -11.2     | 297 | NPC476565          | -10.7                    | -10.9    | -11.0     |
| 239 | NPC327969          | -10.2                    | -11.2    | -11.2     | 298 | NPC477219          | -10.1                    | -11.0    | -11.0     |
| 240 | NPC474179          | -11.1                    | -11.2    | -11.2     | 299 | NPC101991          | -9.8                     | -10.7    | -11.0     |
| 241 | NPC475417          | -11.1                    | -11.2    | -11.2     | 300 | NPC160527          | -10.9                    | -11.0    | -11.0     |
| 242 | NPC477206          | -10.6                    | -11.2    | -11.2     | 301 | NPC473666          | -11.0                    | -11.0    | -11.0     |
| 243 | NPC147363          | -10.3                    | -11.0    | -11.2     | 302 | NPC230276          | -10.9                    | -11.0    | -11.0     |
| 244 | NPC15551           | -11.1                    | -11.2    | -11.2     | 303 | NPC314358          | -8.1                     | -10.4    | -11.0     |
| 245 | NPC254798          | -8.5                     | -11.1    | -11.2     | 304 | NPC471153          | -10.4                    | -10.8    | -11.0     |
| 246 | NPC290683          | -10.7                    | -10.9    | -11.2     | 305 | NPC223187          | -11.0                    | -11.0    | -11.0     |
| 247 | NPC42965           | -11.3                    | -10.6    | -11.2     | 306 | NPC227132          | -10.8                    | -10.9    | -11.0     |
| 248 | NPC132211          | -11.1                    | -11.1    | -11.1     | 307 | NPC470273          | -11.2                    | -10.9    | -11.0     |
| 249 | NPC250129          | -11.1                    | -11.1    | -11.1     | 308 | NPC474736          | -10.0                    | -11.0    | -11.0     |
| 250 | NPC27324           | -10.8                    | -11.1    | -11.1     | 309 | NPC149873          | -9.9                     | -10.9    | -11.0     |
| 251 | NPC312942          | -10.3                    | -10.9    | -11.1     | 310 | NPC243893          | -10.8                    | -10.9    | -11.0     |
| 252 | NPC477532          | -10.3                    | -11.3    | -11.1     | 311 | NPC310621          | -9.2                     | -11.0    | -11.0     |
| 253 | NPC909             | -11.1                    | -11.1    | -11.1     | 312 | NPC473493          | -9.2                     | -10.7    | -11.0     |
| 254 | NPC161060          | -11.3                    | -11.3    | -11.1     | 313 | NPC102810          | -10.1                    | -10.9    | -11.0     |
| 255 | NPC270268          | -10.3                    | -10.9    | -11.1     | 314 | NPC158347          | -11.0                    | -11.0    | -11.0     |
| 256 | NPC469996          | -10.6                    | -11.3    | -11.1     | 315 | NPC235885          | -9.7                     | -11.0    | -11.0     |
| 257 | NPC475373          | -11.0                    | -11.1    | -11.1     | 316 | NPC257175          | -10.6                    | -10.9    | -11.0     |
| 258 | NPC214550          | -10.6                    | -10.9    | -11.1     | 317 | NPC157828          | -11.0                    | -11.0    | -11.0     |
| 259 | NPC473177          | -12.5                    | -11.1    | -11.1     | 318 | NPC471394          | -11.0                    | -11.0    | -11.0     |
| 260 | NPC473757          | -11.1                    | -11.1    | -11.1     | 319 | NPC471601          | -9.3                     | -10.8    | -11.0     |
| 261 | NPC83331           | -9.9                     | -10.9    | -11.1     | 320 | NPC473593          | -10.9                    | -11.0    | -11.0     |
| 262 | NPC242446          | -11.1                    | -11.1    | -11.1     | 321 | NPC474923          | -11.0                    | -11.0    | -11.0     |
| 263 | NPC471396          | -11.1                    | -11.1    | -11.1     | 322 | NPC475436          | -10.9                    | -11.0    | -11.0     |
| 264 | NPC477066          | -9.4                     | -11.1    | -11.1     | 323 | NPC476963          | -9.9                     | -11.0    | -11.0     |
| 265 | NPC102088          | -11.0                    | -11.1    | -11.1     | 324 | NPC119493          | -10.3                    | -11.0    | -11.0     |
| 266 | NPC71933           | -10.8                    | -11.0    | -11.1     | 325 | NPC329731          | -9.6                     | -11.1    | -11.0     |
| 267 | NPC97388           | -11.1                    | -11.1    | -11.1     | 326 | NPC89317           | -10.7                    | -10.9    | -11.0     |
| 268 | NPC158020          | -8.4                     | -11.1    | -11.1     | 327 | NPC98457           | -8.4                     | -10.8    | -11.0     |
| 269 | NPC160413          | -11.1                    | -11.1    | -11.1     | 328 | NPC207243          | -9.8                     | -10.7    | -10.9     |
| 270 | NPC171619          | -11.1                    | -11.1    | -11.1     | 329 | NPC109512          | -10.9                    | -10.9    | -10.9     |
| 271 | NPC263485          | -11.0                    | -11.2    | -11.1     | 330 | NPC127790          | -10.9                    | -10.9    | -10.9     |
| 272 | NPC26881           | -10.4                    | -11.1    | -11.1     | 331 | NPC12890           | -10.9                    | -10.9    | -10.9     |
| 273 | NPC475420          | -11.1                    | -11.1    | -11.1     | 332 | NPC153792          | -10.9                    | -10.9    | -10.9     |
| 274 | NPC79107           | -10.6                    | -11.1    | -11.1     | 333 | NPC473115          | -9.3                     | -10.6    | -10.9     |
| 275 | NPC10064           | -10.7                    | -11.0    | -11.1     | 334 | NPC475602          | -10.9                    | -10.9    | -10.9     |
| 276 | NPC116701          | -12.1                    | -12.3    | -11.1     | 335 | NPC102253          | -10.8                    | -10.8    | -10.9     |
| 277 | NPC180605          | -9.6                     | -11.0    | -11.1     | 336 | NPC131693          | -10.4                    | -10.7    | -10.9     |
| 278 | NPC181845          | -11.0                    | -11.1    | -11.1     | 337 | NPC220974          | -10.8                    | -10.9    | -10.9     |
| 279 | NPC315525          | -11.1                    | -11.1    | -11.1     | 338 | NPC477362          | -10.8                    | -10.9    | -10.9     |
| 280 | NPC120351          | -11.0                    | -11.1    | -11.1     | 339 | NPC126002          | -10.8                    | -10.9    | -10.9     |
| 281 | NPC323198          | -10.1                    | -11.1    | -11.1     | 340 | NPC141970          | -9.8                     | -10.8    | -10.9     |
| 282 | NPC473441          | -10.8                    | -11.1    | -11.1     | 341 | NPC183570          | -10.1                    | -10.9    | -10.9     |
| 283 | NPC476817          | -10.7                    | -11.1    | -11.1     | 342 | NPC20302           | -10.7                    | -10.9    | -10.9     |
| 284 | NPC24370           | -11.0                    | -11.1    | -11.1     | 343 | NPC470277          | -11.6                    | -10.9    | -10.9     |
| 285 | NPC73929           | -10.5                    | -10.8    | -11.1     | 344 | NPC476599          | -9.7                     | -10.9    | -10.9     |
| 286 | NPC20388           | -9.0                     | -11.1    | -11.1     | 345 | NPC241477          | -10.9                    | -10.9    | -10.9     |
| 287 | NPC233727          | -10.3                    | -10.9    | -11.1     | 346 | NPC477291          | -10.2                    | -11.0    | -10.9     |
| 288 | NPC477067          | -11.0                    | -11.0    | -11.1     | 347 | NPC62792           | -10.3                    | -10.7    | -10.9     |



Table S1. Continued.

| No. | Compound Name/Code | Docking Score (kcal/mol) |          |           | No. | Compound Name/Code | Docking Score (kcal/mol) |          |           |
|-----|--------------------|--------------------------|----------|-----------|-----|--------------------|--------------------------|----------|-----------|
|     |                    | Fast                     | Moderate | Expensive |     |                    | Fast                     | Moderate | Expensive |
| 348 | NPC80650           | -8.0                     | -10.9    | -10.9     | 407 | NPC474897          | -10.8                    | -10.8    | -10.8     |
| 349 | NPC168319          | -10.9                    | -10.9    | -10.9     | 408 | NPC81939           | -8.8                     | -10.8    | -10.8     |
| 350 | NPC243594          | -10.8                    | -10.9    | -10.9     | 409 | NPC114378          | -10.1                    | -10.7    | -10.8     |
| 351 | NPC477391          | -9.2                     | -10.5    | -10.9     | 410 | NPC188815          | -9.6                     | -10.4    | -10.8     |
| 352 | NPC477901          | -10.3                    | -10.9    | -10.9     | 411 | NPC195715          | -10.7                    | -10.8    | -10.8     |
| 353 | NPC477914          | -10.9                    | -10.9    | -10.9     | 412 | NPC256104          | -10.5                    | -10.8    | -10.8     |
| 354 | NPC171007          | -10.9                    | -10.9    | -10.9     | 413 | NPC470427          | -10.8                    | -10.8    | -10.8     |
| 355 | NPC191382          | -8.8                     | -10.7    | -10.9     | 414 | NPC476883          | -10.4                    | -10.7    | -10.8     |
| 356 | NPC197447          | -11.2                    | -10.9    | -10.9     | 415 | NPC476888          | -10.6                    | -10.8    | -10.8     |
| 357 | NPC245055          | -10.8                    | -10.9    | -10.9     | 416 | NPC126066          | -10.8                    | -10.8    | -10.8     |
| 358 | NPC273467          | -8.3                     | -10.9    | -10.9     | 417 | NPC166143          | -10.8                    | -10.8    | -10.8     |
| 359 | NPC281134          | -10.2                    | -10.8    | -10.9     | 418 | NPC298233          | -10.8                    | -10.8    | -10.8     |
| 360 | NPC327095          | -10.6                    | -10.8    | -10.9     | 419 | NPC309991          | -10.2                    | -10.7    | -10.8     |
| 361 | NPC471403          | -10.8                    | -10.9    | -10.9     | 420 | NPC319232          | -10.7                    | -10.8    | -10.8     |
| 362 | NPC477903          | -10.6                    | -10.5    | -10.9     | 421 | NPC470066          | -10.7                    | -10.8    | -10.8     |
| 363 | NPC61411           | -10.9                    | -10.9    | -10.9     | 422 | NPC155910          | -9.5                     | -10.7    | -10.8     |
| 364 | NPC202866          | -9.4                     | -11.0    | -10.9     | 423 | NPC180204          | -10.5                    | -10.8    | -10.8     |
| 365 | NPC475369          | -10.5                    | -10.9    | -10.9     | 424 | NPC6206            | -10.0                    | -10.7    | -10.8     |
| 366 | NPC475605          | -10.0                    | -10.8    | -10.9     | 425 | NPC12103           | -9.8                     | -10.6    | -10.8     |
| 367 | NPC74969           | -10.8                    | -10.9    | -10.9     | 426 | NPC202198          | -10.2                    | -10.4    | -10.8     |
| 368 | NPC124358          | -8.6                     | -10.5    | -10.9     | 427 | NPC227275          | -8.9                     | -10.7    | -10.8     |
| 369 | NPC272549          | -10.8                    | -10.9    | -10.9     | 428 | NPC29695           | -10.3                    | -10.6    | -10.8     |
| 370 | NPC471541          | -11.7                    | -10.7    | -10.9     | 429 | NPC4574            | -10.0                    | -10.7    | -10.8     |
| 371 | NPC472361          | -12.5                    | -11.7    | -10.9     | 430 | NPC470309          | -9.9                     | -10.7    | -10.8     |
| 372 | NPC6215            | -10.9                    | -10.9    | -10.9     | 431 | NPC470882          | -10.8                    | -10.8    | -10.8     |
| 373 | NPC16657           | -10.4                    | -10.7    | -10.9     | 432 | NPC473178          | -11.5                    | -10.7    | -10.8     |
| 374 | NPC471617          | -9.6                     | -10.8    | -10.9     | 433 | NPC474315          | -10.6                    | -10.7    | -10.8     |
| 375 | NPC476257          | -11.0                    | -10.7    | -10.9     | 434 | NPC476491          | -10.2                    | -10.7    | -10.8     |
| 376 | NPC476890          | -10.6                    | -10.8    | -10.9     | 435 | NPC132771          | -10.4                    | -10.8    | -10.7     |
| 377 | NPC184933          | -10.8                    | -11.0    | -10.8     | 436 | NPC138974          | -9.9                     | -10.7    | -10.7     |
| 378 | NPC61382           | -11.2                    | -11.0    | -10.8     | 437 | NPC224557          | -10.2                    | -10.7    | -10.7     |
| 379 | NPC183580          | -10.8                    | -10.8    | -10.8     | 438 | NPC253268          | -10.6                    | -10.8    | -10.7     |
| 380 | NPC242728          | -11.0                    | -10.3    | -10.8     | 439 | NPC266374          | -8.9                     | -10.8    | -10.7     |
| 381 | NPC246904          | -10.7                    | -10.8    | -10.8     | 440 | NPC277351          | -10.8                    | -10.8    | -10.7     |
| 382 | NPC43353           | -10.6                    | -10.8    | -10.8     | 441 | NPC292775          | -10.7                    | -10.7    | -10.7     |
| 383 | NPC198893          | -8.2                     | -11.9    | -10.8     | 442 | NPC292793          | -10.6                    | -10.7    | -10.7     |
| 384 | NPC253456          | -10.9                    | -10.8    | -10.8     | 443 | NPC474571          | -10.8                    | -10.7    | -10.7     |
| 385 | NPC286528          | -10.0                    | -10.8    | -10.8     | 444 | NPC476750          | -9.6                     | -10.7    | -10.7     |
| 386 | NPC33064           | -10.1                    | -10.8    | -10.8     | 445 | NPC476889          | -10.5                    | -10.7    | -10.7     |
| 387 | NPC469722          | -10.8                    | -10.8    | -10.8     | 446 | NPC291634          | -10.3                    | -10.5    | -10.7     |
| 388 | NPC475654          | -10.8                    | -10.8    | -10.8     | 447 | NPC3381            | -10.2                    | -10.6    | -10.7     |
| 389 | NPC101067          | -10.8                    | -10.8    | -10.8     | 448 | NPC470960          | -10.7                    | -10.7    | -10.7     |
| 390 | NPC188239          | -10.8                    | -10.8    | -10.8     | 449 | NPC471994          | -10.7                    | -10.7    | -10.7     |
| 391 | NPC325740          | -10.5                    | -11.0    | -10.8     | 450 | NPC478108          | -9.7                     | -10.4    | -10.7     |
| 392 | NPC471432          | -10.6                    | -10.7    | -10.8     | 451 | NPC191489          | -9.9                     | -10.7    | -10.7     |
| 393 | NPC473851          | -9.9                     | -10.4    | -10.8     | 452 | NPC204652          | -10.2                    | -10.6    | -10.7     |
| 394 | NPC120994          | -9.8                     | -10.7    | -10.8     | 453 | NPC22248           | -10.7                    | -11.0    | -10.7     |
| 395 | NPC156298          | -9.5                     | -12.2    | -10.8     | 454 | NPC271387          | -10.0                    | -10.7    | -10.7     |
| 396 | NPC175477          | -10.8                    | -10.8    | -10.8     | 455 | NPC280566          | -11.4                    | -10.7    | -10.7     |
| 397 | NPC223236          | -10.5                    | -10.8    | -10.8     | 456 | NPC96759           | -10.7                    | -10.7    | -10.7     |
| 398 | NPC287063          | -9.8                     | -10.8    | -10.8     | 457 | NPC233273          | -10.1                    | -10.7    | -10.7     |
| 399 | NPC312536          | -10.7                    | -10.8    | -10.8     | 458 | NPC320475          | -10.5                    | -10.7    | -10.7     |
| 400 | NPC328287          | -9.5                     | -10.8    | -10.8     | 459 | NPC324001          | -11.0                    | -11.0    | -10.7     |
| 401 | NPC43747           | -9.8                     | -10.5    | -10.8     | 460 | NPC476879          | -9.4                     | -10.6    | -10.7     |
| 402 | NPC471135          | -8.7                     | -10.8    | -10.8     | 461 | NPC476960          | -9.7                     | -10.7    | -10.7     |
| 403 | NPC477392          | -8.2                     | -10.5    | -10.8     | 462 | NPC132386          | -10.7                    | -10.7    | -10.7     |
| 404 | NPC88326           | -10.8                    | -11.3    | -10.8     | 463 | NPC290261          | -9.0                     | -10.5    | -10.7     |
| 405 | NPC137657          | -10.8                    | -10.8    | -10.8     | 464 | NPC315499          | -10.9                    | -10.7    | -10.7     |
| 406 | NPC329761          | -9.1                     | -10.7    | -10.8     | 465 | NPC317590          | -10.3                    | -10.6    | -10.7     |

Table S1. Continued.

| No. | Compound Name/Code | Docking Score (kcal/mol) |          |           | No. | Compound Name/Code | Docking Score (kcal/mol) |          |           |
|-----|--------------------|--------------------------|----------|-----------|-----|--------------------|--------------------------|----------|-----------|
|     |                    | Fast                     | Moderate | Expensive |     |                    | Fast                     | Moderate | Expensive |
| 466 | NPC96016           | -9.3                     | -10.5    | -10.7     | 525 | NPC471963          | -8.2                     | -10.4    | -10.6     |
| 467 | NPC157817          | -10.7                    | -10.8    | -10.7     | 526 | NPC472206          | -10.6                    | -10.6    | -10.6     |
| 468 | NPC211845          | -10.7                    | -10.7    | -10.7     | 527 | NPC472238          | -10.6                    | -10.6    | -10.6     |
| 469 | NPC241935          | -10.7                    | -10.7    | -10.7     | 528 | NPC477101          | -9.0                     | -10.6    | -10.6     |
| 470 | NPC2497            | -10.7                    | -10.7    | -10.7     | 529 | NPC478060          | -10.2                    | -10.6    | -10.6     |
| 471 | NPC289776          | -9.1                     | -10.7    | -10.7     | 530 | NPC58052           | -9.5                     | -10.6    | -10.6     |
| 472 | NPC298647          | -10.4                    | -10.7    | -10.7     | 531 | NPC159338          | -10.5                    | -10.6    | -10.6     |
| 473 | NPC322353          | -10.5                    | -10.6    | -10.7     | 532 | NPC178025          | -10.4                    | -10.6    | -10.6     |
| 474 | NPC478261          | -10.7                    | -10.7    | -10.7     | 533 | NPC313867          | -8.8                     | -10.5    | -10.6     |
| 475 | NPC79921           | -9.2                     | -10.7    | -10.7     | 534 | NPC470750          | -10.4                    | -10.6    | -10.6     |
| 476 | NPC85173           | -10.7                    | -10.7    | -10.7     | 535 | NPC472231          | -10.6                    | -10.6    | -10.6     |
| 477 | NPC144202          | -10.3                    | -10.6    | -10.7     | 536 | NPC474190          | -10.2                    | -10.9    | -10.6     |
| 478 | NPC199259          | -10.7                    | -10.7    | -10.7     | 537 | NPC475244          | -10.6                    | -10.6    | -10.6     |
| 479 | NPC254581          | -10.7                    | -10.7    | -10.7     | 538 | NPC476077          | -10.6                    | -11.2    | -10.6     |
| 480 | NPC322982          | -10.2                    | -10.7    | -10.7     | 539 | NPC476126          | -10.6                    | -10.6    | -10.6     |
| 481 | NPC469824          | -9.2                     | -10.7    | -10.7     | 540 | NPC476878          | -10.2                    | -10.6    | -10.6     |
| 482 | NPC476097          | -10.7                    | -10.7    | -10.7     | 541 | NPC70155           | -10.6                    | -10.6    | -10.6     |
| 483 | NPC57690           | -10.6                    | -10.7    | -10.7     | 542 | NPC13494           | -9.6                     | -10.4    | -10.6     |
| 484 | NPC227583          | -9.0                     | -10.7    | -10.7     | 543 | NPC187255          | -10.3                    | -10.5    | -10.6     |
| 485 | NPC241050          | -9.6                     | -11.0    | -10.7     | 544 | NPC19013           | -10.6                    | -10.6    | -10.6     |
| 486 | NPC268676          | -10.5                    | -10.7    | -10.7     | 545 | NPC243065          | -10.6                    | -10.6    | -10.6     |
| 487 | NPC469382          | -10.2                    | -10.6    | -10.7     | 546 | NPC273199          | -10.6                    | -10.6    | -10.6     |
| 488 | NPC470623          | -9.7                     | -10.8    | -10.7     | 547 | NPC295676          | -10.6                    | -10.6    | -10.6     |
| 489 | NPC472225          | -10.7                    | -10.7    | -10.7     | 548 | NPC472863          | -8.6                     | -10.5    | -10.6     |
| 490 | NPC124029          | -9.1                     | -10.4    | -10.7     | 549 | NPC473535          | -9.6                     | -10.6    | -10.6     |
| 491 | NPC267965          | -10.7                    | -10.7    | -10.7     | 550 | NPC475230          | -10.5                    | -10.6    | -10.6     |
| 492 | NPC284102          | -10.7                    | -10.7    | -10.7     | 551 | NPC477494          | -8.5                     | -10.6    | -10.6     |
| 493 | NPC289905          | -10.5                    | -10.6    | -10.7     | 552 | NPC103782          | -9.2                     | -10.6    | -10.6     |
| 494 | NPC473006          | -10.0                    | -10.7    | -10.7     | 553 | NPC209174          | -10.6                    | -10.6    | -10.6     |
| 495 | NPC475597          | -10.7                    | -10.7    | -10.7     | 554 | NPC235557          | -10.1                    | -10.5    | -10.6     |
| 496 | NPC91125           | -8.4                     | -10.5    | -10.7     | 555 | NPC240042          | -8.0                     | -10.5    | -10.6     |
| 497 | NPC141957          | -10.0                    | -10.5    | -10.7     | 556 | NPC268530          | -10.5                    | -10.6    | -10.6     |
| 498 | NPC147635          | -10.1                    | -10.6    | -10.7     | 557 | NPC32064           | -10.6                    | -10.6    | -10.6     |
| 499 | NPC252338          | -10.2                    | -10.4    | -10.7     | 558 | NPC477899          | -10.5                    | -11.4    | -10.6     |
| 500 | NPC270511          | -10.2                    | -10.6    | -10.7     | 559 | NPC60150           | -10.6                    | -10.6    | -10.6     |
| 501 | NPC312630          | -10.6                    | -10.7    | -10.7     | 560 | NPC242774          | -10.3                    | -10.6    | -10.6     |
| 502 | NPC323752          | -10.5                    | -10.7    | -10.7     | 561 | NPC286786          | -10.5                    | -10.6    | -10.6     |
| 503 | NPC37116           | -10.6                    | -10.7    | -10.7     | 562 | NPC42670           | -10.6                    | -10.6    | -10.6     |
| 504 | NPC477556          | -10.4                    | -10.6    | -10.7     | 563 | NPC470418          | -9.2                     | -10.6    | -10.6     |
| 505 | NPC51653           | -9.1                     | -10.6    | -10.7     | 564 | NPC475988          | -10.6                    | -10.6    | -10.6     |
| 506 | NPC58029           | -10.7                    | -10.6    | -10.7     | 565 | NPC135043          | -10.6                    | -10.6    | -10.6     |
| 507 | NPC262077          | -9.1                     | -10.6    | -10.6     | 566 | NPC174122          | -8.4                     | -10.5    | -10.6     |
| 508 | NPC45576           | -10.6                    | -10.6    | -10.6     | 567 | NPC241636          | -10.6                    | -10.6    | -10.6     |
| 509 | NPC470874          | -10.7                    | -10.6    | -10.6     | 568 | NPC30222           | -9.4                     | -10.5    | -10.6     |
| 510 | NPC472673          | -9.1                     | -10.6    | -10.6     | 569 | NPC470274          | -11.0                    | -10.5    | -10.6     |
| 511 | NPC105073          | -10.3                    | -10.6    | -10.6     | 570 | NPC474106          | -10.5                    | -10.6    | -10.6     |
| 512 | NPC118033          | -10.2                    | -10.6    | -10.6     | 571 | NPC474107          | -10.3                    | -10.6    | -10.6     |
| 513 | NPC23621           | -10.6                    | -10.6    | -10.6     | 572 | NPC475718          | -8.9                     | -10.6    | -10.6     |
| 514 | NPC74639           | -10.7                    | -10.6    | -10.6     | 573 | NPC49911           | -10.6                    | -10.6    | -10.6     |
| 515 | NPC78473           | -10.4                    | -10.6    | -10.6     | 574 | NPC116742          | -9.3                     | -10.6    | -10.6     |
| 516 | NPC96131           | -11.3                    | -10.4    | -10.6     | 575 | NPC33949           | -10.5                    | -10.5    | -10.6     |
| 517 | NPC15215           | -10.6                    | -10.6    | -10.6     | 576 | NPC472926          | -9.9                     | -10.4    | -10.6     |
| 518 | NPC155974          | -10.4                    | -10.6    | -10.6     | 577 | NPC473279          | -10.6                    | -10.6    | -10.6     |
| 519 | NPC176246          | -8.6                     | -12.0    | -10.6     | 578 | NPC476216          | -10.6                    | -10.5    | -10.6     |
| 520 | NPC202705          | -10.4                    | -10.6    | -10.6     | 579 | NPC48305           | -10.6                    | -10.6    | -10.6     |
| 521 | NPC27615           | -10.6                    | -10.7    | -10.6     | 580 | NPC5292            | -6.9                     | -10.5    | -10.6     |
| 522 | NPC283343          | -10.6                    | -10.6    | -10.6     | 581 | NPC87393           | -10.2                    | -10.5    | -10.6     |
| 523 | NPC300557          | -10.3                    | -10.5    | -10.6     | 582 | NPC88668           | -8.5                     | -10.4    | -10.6     |
| 524 | NPC41376           | -9.9                     | -10.6    | -10.6     | 583 | NPC150977          | -9.9                     | -10.5    | -10.6     |

Table S1. Continued.

| No. | Compound Name/Code | Docking Score (kcal/mol) |          |           | No. | Compound Name/Code | Docking Score (kcal/mol) |          |           |
|-----|--------------------|--------------------------|----------|-----------|-----|--------------------|--------------------------|----------|-----------|
|     |                    | Fast                     | Moderate | Expensive |     |                    | Fast                     | Moderate | Expensive |
| 584 | NPC20734           | -10.0                    | -10.5    | -10.6     | 643 | NPC472233          | -10.5                    | -10.5    | -10.5     |
| 585 | NPC254146          | -10.6                    | -10.6    | -10.6     | 644 | NPC475296          | -8.1                     | -10.5    | -10.5     |
| 586 | NPC312660          | -10.5                    | -10.6    | -10.6     | 645 | NPC93744           | -10.4                    | -10.5    | -10.5     |
| 587 | NPC313921          | -10.6                    | -10.6    | -10.6     | 646 | NPC190442          | -10.5                    | -10.5    | -10.5     |
| 588 | NPC315848          | -8.6                     | -10.4    | -10.6     | 647 | NPC225821          | -10.4                    | -10.5    | -10.5     |
| 589 | NPC32017           | -10.2                    | -10.6    | -10.6     | 648 | NPC240604          | -10.5                    | -10.5    | -10.5     |
| 590 | NPC469452          | -10.5                    | -10.7    | -10.6     | 649 | NPC266955          | -10.1                    | -10.4    | -10.5     |
| 591 | NPC473467          | -10.5                    | -10.6    | -10.6     | 650 | NPC4309            | -10.3                    | -10.5    | -10.5     |
| 592 | NPC474790          | -10.3                    | -10.5    | -10.6     | 651 | NPC470076          | -10.3                    | -10.5    | -10.5     |
| 593 | NPC131405          | -11.2                    | -11.8    | -10.5     | 652 | NPC472226          | -10.5                    | -10.5    | -10.5     |
| 594 | NPC208994          | -10.0                    | -10.3    | -10.5     | 653 | NPC473429          | -10.2                    | -10.5    | -10.5     |
| 595 | NPC218301          | -10.5                    | -10.5    | -10.5     | 654 | NPC475719          | -10.4                    | -10.5    | -10.5     |
| 596 | NPC229976          | -10.5                    | -10.5    | -10.5     | 655 | NPC477042          | -10.5                    | -10.5    | -10.5     |
| 597 | NPC237182          | -10.0                    | -10.5    | -10.5     | 656 | NPC477715          | -9.9                     | -10.4    | -10.5     |
| 598 | NPC315974          | -10.0                    | -10.5    | -10.5     | 657 | NPC477857          | -9.5                     | -10.4    | -10.5     |
| 599 | NPC316930          | -10.1                    | -10.4    | -10.5     | 658 | NPC282905          | -10.5                    | -10.5    | -10.5     |
| 600 | NPC32715           | -9.8                     | -10.4    | -10.5     | 659 | NPC40749           | -8.3                     | -10.5    | -10.5     |
| 601 | NPC470873          | -10.5                    | -10.5    | -10.5     | 660 | NPC470068          | -10.3                    | -10.4    | -10.5     |
| 602 | NPC475548          | -10.5                    | -10.5    | -10.5     | 661 | NPC477099          | -9.4                     | -10.4    | -10.5     |
| 603 | NPC67569           | -9.7                     | -10.5    | -10.5     | 662 | NPC477557          | -10.5                    | -10.5    | -10.5     |
| 604 | NPC86346           | -10.3                    | -10.5    | -10.5     | 663 | NPC51247           | -10.3                    | -10.5    | -10.5     |
| 605 | NPC101886          | -10.5                    | -10.5    | -10.5     | 664 | NPC90822           | -10.3                    | -10.4    | -10.5     |
| 606 | NPC122056          | -10.5                    | -10.5    | -10.5     | 665 | NPC163693          | -10.4                    | -10.4    | -10.5     |
| 607 | NPC13743           | -9.7                     | -10.5    | -10.5     | 666 | NPC176840          | -10.4                    | -10.5    | -10.5     |
| 608 | NPC473573          | -10.4                    | -10.5    | -10.5     | 667 | NPC18982           | -10.4                    | -10.4    | -10.5     |
| 609 | NPC478036          | -10.1                    | -10.5    | -10.5     | 668 | NPC247563          | -10.3                    | -10.4    | -10.5     |
| 610 | NPC8374            | -10.5                    | -10.5    | -10.5     | 669 | NPC255082          | -10.2                    | -10.5    | -10.5     |
| 611 | NPC133506          | -10.5                    | -10.5    | -10.5     | 670 | NPC255309          | -10.4                    | -10.4    | -10.5     |
| 612 | NPC262083          | -10.5                    | -10.5    | -10.5     | 671 | NPC27918           | -10.5                    | -10.5    | -10.5     |
| 613 | NPC264875          | -9.3                     | -10.6    | -10.5     | 672 | NPC298072          | -10.0                    | -10.4    | -10.5     |
| 614 | NPC470419          | -10.5                    | -10.5    | -10.5     | 673 | NPC310981          | -10.6                    | -10.5    | -10.5     |
| 615 | NPC475027          | -10.4                    | -10.5    | -10.5     | 674 | NPC34177           | -10.5                    | -10.5    | -10.5     |
| 616 | NPC475151          | -9.9                     | -10.5    | -10.5     | 675 | NPC470954          | -10.5                    | -10.5    | -10.5     |
| 617 | NPC17274           | -9.5                     | -10.5    | -10.5     | 676 | NPC185530          | -10.4                    | -10.5    | -10.5     |
| 618 | NPC266513          | -9.6                     | -11.6    | -10.5     | 677 | NPC234548          | -12.0                    | -10.4    | -10.5     |
| 619 | NPC285184          | -10.4                    | -10.5    | -10.5     | 678 | NPC471404          | -10.3                    | -10.5    | -10.5     |
| 620 | NPC290746          | -9.6                     | -10.6    | -10.5     | 679 | NPC473734          | -8.6                     | -10.4    | -10.5     |
| 621 | NPC41318           | -10.4                    | -10.5    | -10.5     | 680 | NPC475274          | -10.3                    | -10.4    | -10.5     |
| 622 | NPC97078           | -10.0                    | -10.5    | -10.5     | 681 | NPC476080          | -8.8                     | -10.6    | -10.5     |
| 623 | NPC114441          | -8.3                     | -10.3    | -10.5     | 682 | NPC477363          | -10.3                    | -10.5    | -10.5     |
| 624 | NPC126128          | -10.5                    | -10.5    | -10.5     | 683 | NPC153700          | -9.5                     | -10.4    | -10.4     |
| 625 | NPC138775          | -9.6                     | -10.4    | -10.5     | 684 | NPC174024          | -10.1                    | -10.8    | -10.4     |
| 626 | NPC139783          | -10.5                    | -10.5    | -10.5     | 685 | NPC245410          | -10.4                    | -10.4    | -10.4     |
| 627 | NPC178541          | -10.5                    | -10.5    | -10.5     | 686 | NPC267926          | -10.4                    | -10.4    | -10.4     |
| 628 | NPC289383          | -10.1                    | -11.6    | -10.5     | 687 | NPC27518           | -10.3                    | -10.4    | -10.4     |
| 629 | NPC293038          | -10.2                    | -10.5    | -10.5     | 688 | NPC307396          | -10.4                    | -10.4    | -10.4     |
| 630 | NPC306799          | -10.1                    | -10.4    | -10.5     | 689 | NPC40918           | -10.4                    | -10.4    | -10.4     |
| 631 | NPC473173          | -10.4                    | -10.5    | -10.5     | 690 | NPC471113          | -10.4                    | -10.4    | -10.4     |
| 632 | NPC474370          | -9.7                     | -10.5    | -10.5     | 691 | NPC478258          | -10.5                    | -10.5    | -10.4     |
| 633 | NPC476091          | -10.3                    | -10.5    | -10.5     | 692 | NPC49964           | -10.2                    | -10.4    | -10.4     |
| 634 | NPC4910            | -10.4                    | -10.4    | -10.5     | 693 | NPC99411           | -9.7                     | -10.3    | -10.4     |
| 635 | NPC108476          | -10.5                    | -10.5    | -10.5     | 694 | NPC151292          | -8.1                     | -10.4    | -10.4     |
| 636 | NPC126815          | -10.4                    | -10.5    | -10.5     | 695 | NPC278540          | -10.3                    | -10.4    | -10.4     |
| 637 | NPC242068          | -10.4                    | -10.5    | -10.5     | 696 | NPC39431           | -10.4                    | -10.4    | -10.4     |
| 638 | NPC244606          | -10.5                    | -10.5    | -10.5     | 697 | NPC469731          | -10.4                    | -10.4    | -10.4     |
| 639 | NPC284162          | -10.5                    | -10.5    | -10.5     | 698 | NPC470053          | -9.4                     | -10.4    | -10.4     |
| 640 | NPC470126          | -9.6                     | -10.5    | -10.5     | 699 | NPC475238          | -10.4                    | -10.4    | -10.4     |
| 641 | NPC470223          | -9.2                     | -10.5    | -10.5     | 700 | NPC56618           | -9.7                     | -10.4    | -10.4     |
| 642 | NPC472229          | -10.5                    | -10.5    | -10.5     | 701 | NPC93662           | -10.4                    | -10.4    | -10.4     |

Table S1. Continued.

| No. | Compound Name/Code | Docking Score (kcal/mol) |          |           | No. | Compound Name/Code | Docking Score (kcal/mol) |          |           |
|-----|--------------------|--------------------------|----------|-----------|-----|--------------------|--------------------------|----------|-----------|
|     |                    | Fast                     | Moderate | Expensive |     |                    | Fast                     | Moderate | Expensive |
| 702 | NPC117027          | -10.4                    | -10.4    | -10.4     | 761 | NPC50615           | -9.5                     | -11.4    | -10.3     |
| 703 | NPC177064          | -10.4                    | -10.4    | -10.4     | 762 | NPC185665          | -10.3                    | -10.3    | -10.3     |
| 704 | NPC198621          | -9.0                     | -10.3    | -10.4     | 763 | NPC475253          | -9.7                     | -10.4    | -10.3     |
| 705 | NPC209509          | -10.1                    | -10.4    | -10.4     | 764 | NPC74727           | -10.3                    | -10.4    | -10.3     |
| 706 | NPC273623          | -10.3                    | -10.4    | -10.4     | 765 | NPC162033          | -10.5                    | -11.1    | -10.3     |
| 707 | NPC293044          | -10.4                    | -10.4    | -10.4     | 766 | NPC235364          | -9.7                     | -10.3    | -10.3     |
| 708 | NPC470425          | -10.4                    | -10.4    | -10.4     | 767 | NPC289086          | -9.8                     | -10.4    | -10.3     |
| 709 | NPC471720          | -10.4                    | -10.4    | -10.4     | 768 | NPC141053          | -10.0                    | -10.4    | -10.3     |
| 710 | NPC473310          | -10.2                    | -10.4    | -10.4     | 769 | NPC476830          | -9.9                     | -10.7    | -10.3     |
| 711 | NPC474448          | -10.5                    | -10.4    | -10.4     | 770 | NPC270586          | -9.1                     | -10.4    | -10.2     |
| 712 | NPC93416           | -10.5                    | -10.5    | -10.4     | 771 | NPC320026          | -10.5                    | -10.7    | -10.2     |
| 713 | NPC110882          | -10.2                    | -10.4    | -10.4     | 772 | NPC159526          | -9.6                     | -10.4    | -10.2     |
| 714 | NPC194427          | -10.3                    | -10.4    | -10.4     | 773 | NPC474564          | -11.2                    | -12.0    | -10.2     |
| 715 | NPC206592          | -10.4                    | -10.4    | -10.4     | 774 | NPC208189          | -10.6                    | -10.8    | -10.1     |
| 716 | NPC209851          | -8.6                     | -10.4    | -10.4     | 775 | NPC212768          | -10.2                    | -10.5    | -10.1     |
| 717 | NPC251936          | -10.4                    | -10.4    | -10.4     | 776 | NPC475540          | -9.0                     | -10.6    | -10.1     |
| 718 | NPC305501          | -10.2                    | -10.4    | -10.4     | 777 | NPC107674          | -10.1                    | -10.3    | -10.1     |
| 719 | NPC34963           | -10.4                    | -10.4    | -10.4     | 778 | NPC473085          | -9.1                     | -10.4    | -10.1     |
| 720 | NPC472234          | -10.4                    | -10.4    | -10.4     | 779 | NPC235824          | -8.6                     | -10.5    | -10.1     |
| 721 | NPC472294          | -8.9                     | -10.4    | -10.4     | 780 | NPC48599           | -9.3                     | -10.5    | -10.0     |
| 722 | NPC473591          | -10.0                    | -10.3    | -10.4     | 781 | NPC470312          | -8.5                     | -10.6    | -10.0     |
| 723 | NPC477906          | -9.0                     | -10.4    | -10.4     | 782 | NPC470892          | -9.0                     | -10.4    | -10.0     |
| 724 | NPC120917          | -10.3                    | -10.3    | -10.4     | 783 | NPC119481          | -10.5                    | -11.2    | -10.0     |
| 725 | NPC151030          | -8.2                     | -10.4    | -10.4     | 784 | NPC137414          | -9.0                     | -10.4    | -10.0     |
| 726 | NPC168511          | -10.4                    | -10.4    | -10.4     | 785 | NPC471049          | -9.5                     | -10.5    | -9.9      |
| 727 | NPC274448          | -10.2                    | -10.4    | -10.4     | 786 | NPC473220          | -9.6                     | -10.9    | -9.9      |
| 728 | NPC310572          | -9.8                     | -10.4    | -10.4     | 787 | NPC478127          | -9.6                     | -10.7    | -9.9      |
| 729 | NPC43716           | -8.7                     | -10.3    | -10.4     | 788 | NPC136948          | -10.1                    | -10.4    | -9.9      |
| 730 | NPC469720          | -10.4                    | -10.4    | -10.4     | 789 | NPC302392          | -10.3                    | -10.3    | -9.9      |
| 731 | NPC472223          | -10.4                    | -10.4    | -10.4     | 790 | NPC475651          | -11.0                    | -11.5    | -9.9      |
| 732 | NPC474870          | -10.4                    | -10.4    | -10.4     | 791 | NPC3952            | -10.7                    | -10.7    | -9.8      |
| 733 | NPC48339           | -9.5                     | -10.7    | -10.4     | 792 | NPC85316           | -9.7                     | -11.5    | -9.8      |
| 734 | NPC153734          | -10.4                    | -10.4    | -10.4     | 793 | NPC475249          | -8.1                     | -10.9    | -9.8      |
| 735 | NPC190401          | -9.8                     | -10.4    | -10.4     | 794 | NPC202898          | -10.9                    | -12.2    | -9.8      |
| 736 | NPC472695          | -8.8                     | -10.4    | -10.4     | 795 | NPC477468          | -9.7                     | -10.6    | -9.7      |
| 737 | NPC108840          | -10.4                    | -10.4    | -10.4     | 796 | NPC471777          | -9.0                     | -11.2    | -9.7      |
| 738 | NPC255401          | -10.4                    | -10.4    | -10.4     | 797 | NPC470275          | -10.5                    | -10.8    | -9.7      |
| 739 | NPC275575          | -9.8                     | -10.4    | -10.4     | 798 | NPC25736           | -9.9                     | -10.6    | -9.7      |
| 740 | NPC312678          | -9.8                     | -11.0    | -10.4     | 799 | NPC308262          | -9.8                     | -11.1    | -9.6      |
| 741 | NPC469740          | -10.5                    | -10.4    | -10.4     | 800 | NPC328928          | -9.3                     | -10.9    | -9.6      |
| 742 | NPC65700           | -10.8                    | -10.4    | -10.4     | 801 | NPC471582          | -10.6                    | -11.0    | -9.6      |
| 743 | NPC289486          | -10.3                    | -10.4    | -10.4     | 802 | NPC475536          | -9.5                     | -10.8    | -9.6      |
| 744 | NPC41679           | -10.4                    | -10.4    | -10.4     | 803 | NPC93685           | -10.9                    | -11.1    | -9.6      |
| 745 | NPC469394          | -10.0                    | -10.4    | -10.4     | 804 | NPC38350           | -10.3                    | -10.4    | -9.6      |
| 746 | NPC470036          | -10.3                    | -10.4    | -10.4     | 805 | NPC469317          | -8.3                     | -10.5    | -9.5      |
| 747 | NPC472230          | -10.4                    | -10.4    | -10.4     | 806 | NPC99088           | -10.9                    | -11.4    | -9.5      |
| 748 | NPC473680          | -10.2                    | -10.3    | -10.4     | 807 | NPC304322          | -11.0                    | -11.6    | -9.5      |
| 749 | NPC475862          | -10.4                    | -10.4    | -10.4     | 808 | NPC477902          | -9.4                     | -10.5    | -9.5      |
| 750 | NPC18536           | -10.3                    | -10.4    | -10.4     | 809 | NPC69273           | -8.5                     | -10.9    | -9.5      |
| 751 | NPC204491          | -8.3                     | -10.3    | -10.4     | 810 | NPC102843          | -9.5                     | -12.1    | -9.4      |
| 752 | NPC292233          | -9.3                     | -10.3    | -10.4     | 811 | NPC471980          | -9.6                     | -11.2    | -9.4      |
| 753 | NPC35164           | -10.3                    | -10.4    | -10.4     | 812 | NPC473749          | -8.2                     | -10.8    | -9.4      |
| 754 | NPC470037          | -10.3                    | -10.3    | -10.4     | 813 | NPC146563          | -8.3                     | -10.5    | -9.4      |
| 755 | NPC57079           | -10.1                    | -10.3    | -10.4     | 814 | NPC97884           | -8.9                     | -10.8    | -9.4      |
| 756 | NPC104387          | -10.4                    | -10.4    | -10.3     | 815 | NPC269095          | -10.8                    | -10.8    | -9.4      |
| 757 | NPC249817          | -10.2                    | -10.3    | -10.3     | 816 | NPC177834          | -9.1                     | -10.7    | -9.3      |
| 758 | NPC6274            | -10.3                    | -10.4    | -10.3     | 817 | NPC235841          | -8.1                     | -10.4    | -9.2      |
| 759 | NPC472237          | -10.3                    | -10.3    | -10.3     | 818 | NPC323074          | -9.3                     | -10.7    | -9.2      |
| 760 | NPC47386           | -10.1                    | -10.4    | -10.3     | 819 | NPC10005           | -9.1                     | -10.4    | -9.1      |

Table S1. Continued.

| No. | Compound Name/Code | Docking Score (kcal/mol) |          |           | No. | Compound Name/Code | Docking Score (kcal/mol) |          |           |
|-----|--------------------|--------------------------|----------|-----------|-----|--------------------|--------------------------|----------|-----------|
|     |                    | Fast                     | Moderate | Expensive |     |                    | Fast                     | Moderate | Expensive |
| 820 | NPC271494          | -8.5                     | -10.6    | -9.1      | 844 | NPC473160          | -10.4                    | -10.3    | -6.6      |
| 821 | NPC476784          | -11.0                    | -10.4    | -9.1      | 845 | NPC473596          | -9.5                     | -10.3    | -6.6      |
| 822 | NPC470504          | -9.6                     | -10.4    | -9.1      | 846 | NPC474976          | -10.3                    | -10.3    | -6.6      |
| 823 | NPC102725          | -10.1                    | -10.4    | -9.0      | 847 | NPC475025          | -10.2                    | -10.3    | -6.6      |
| 824 | NPC472215          | -8.5                     | -10.5    | -9.0      | 848 | NPC477334          | -9.3                     | -10.3    | -6.6      |
| 825 | NPC473890          | -9.2                     | -10.7    | -9.0      | 849 | NPC63023           | -9.9                     | -10.3    | -6.6      |
| 826 | NPC473020          | -8.7                     | -10.4    | -8.9      | 850 | NPC11847           | -9.9                     | -10.3    | -6.6      |
| 827 | NPC45943           | -9.0                     | -10.9    | -8.9      | 851 | NPC122116          | -10.3                    | -10.3    | -6.6      |
| 828 | NPC229962          | -8.9                     | -10.4    | -8.8      | 852 | NPC133625          | -8.3                     | -10.3    | -6.5      |
| 829 | NPC40716           | -10.3                    | -10.3    | -8.8      | 853 | NPC16350           | -8.2                     | -10.3    | -6.5      |
| 830 | NPC278272          | -9.4                     | -11.3    | -8.7      | 854 | NPC473160          | -10.4                    | -10.3    | -6.5      |
| 831 | NPC115601          | -9.3                     | -11.1    | -8.7      | 855 | NPC473596          | -9.5                     | -10.3    | -6.5      |
| 832 | NPC116024          | -9.3                     | -10.6    | -8.6      | 856 | NPC474976          | -10.3                    | -10.3    | -6.5      |
| 833 | NPC220293          | -10.1                    | -10.8    | -8.6      | 857 | NPC475025          | -10.2                    | -10.3    | -6.5      |
| 834 | NPC160084          | -10.5                    | -11.5    | -8.5      | 858 | NPC477334          | -9.3                     | -10.3    | -6.5      |
| 835 | NPC273798          | -9.1                     | -10.5    | -8.5      | 859 | NPC63023           | -9.9                     | -10.3    | -6.4      |
| 836 | NPC286809          | -11.3                    | -12.1    | -8.2      | 860 | NPC11847           | -9.9                     | -10.3    | -6.4      |
| 837 | NPC165234          | -10.6                    | -12.3    | -7.9      | 861 | NPC122116          | -10.3                    | -10.3    | -6.4      |
| 838 | NPC318581          | -9.1                     | -10.8    | -7.8      | 862 | NPC133625          | -8.3                     | -10.3    | -6.4      |
| 839 | NPC114287          | -10.7                    | -11.1    | -7.6      | 863 | NPC16350           | -10.3                    | -10.3    | -6.4      |
| 840 | NPC117478          | -8.1                     | -10.4    | -7.4      | 864 | NPC190204          | -8.2                     | -10.3    | -6.4      |
| 841 | NPC21691           | -8.4                     | -11.6    | -6.9      | 865 | NPC200589          | -9.1                     | -10.3    | -6.4      |
| 842 | NPC327699          | -10.2                    | -11.3    | -6.8      | 866 | NPC201634          | -10.3                    | -10.3    | -6.4      |
| 843 | NPC477074          | -8.7                     | -10.6    | -6.6      |     |                    |                          |          |           |

<sup>a</sup>Data ranked based on the Expensive docking score.

**Table S2.** Estimated docking scores and MM-GBSA binding energies (in kcal/mol) over 1 ns implicit-solvent MD simulations for taxol and the top 86 NPs within the P-gp binding pocket.<sup>a</sup>

| No. | Compound Name/Code | Docking Score (kcal/mol) |          |           | MM-GBSA Binding Energy (kcal/mol) |
|-----|--------------------|--------------------------|----------|-----------|-----------------------------------|
|     |                    | Fast                     | Moderate | Expensive |                                   |
|     | Taxol              | -9.4                     | -8.0     | -10.2     | -65.9                             |
| 1   | NPC197736          | -8.8                     | -10.9    | -13.5     | -90.6                             |
| 2   | NPC475164          | -9.3                     | -11.3    | -11.9     | -88.9                             |
| 3   | NPC2313            | -9.7                     | -12.1    | -12.0     | -87.4                             |
| 4   | NPC104372          | -9.9                     | -11.0    | -12.2     | -87.1                             |
| 5   | NPC471637          | -9.7                     | -11.4    | -12.2     | -84.8                             |
| 6   | NPC70862           | -11.6                    | -11.8    | -12.2     | -82.3                             |
| 7   | NPC477344          | -10.2                    | -11.1    | -11.9     | -79.6                             |
| 8   | NPC477533          | -11.1                    | -12.6    | -13.3     | -79.4                             |
| 9   | NPC223735          | -9.9                     | -11.4    | -12.6     | -78.8                             |
| 10  | NPC472939          | -10.4                    | -11.9    | -12.2     | -77.7                             |
| 11  | NPC475655          | -9.6                     | -11.1    | -12.1     | -77.6                             |
| 12  | NPC472936          | -10.6                    | -11.5    | -12.0     | -77.2                             |
| 13  | NPC329943          | -11.4                    | -11.8    | -12.0     | -76.9                             |
| 14  | NPC208258          | -8.4                     | -12.1    | -13.1     | -75.9                             |
| 15  | NPC470582          | -10.3                    | -10.5    | -12.1     | -74.7                             |
| 16  | NPC276231          | -15.1                    | -15.9    | -16.4     | -74.2                             |
| 17  | NPC313421          | -10.5                    | -12.1    | -12.1     | -72.4                             |
| 18  | NPC123859          | -10.1                    | -12.1    | -12.5     | -72.3                             |
| 19  | NPC471860          | -11.9                    | -12.1    | -12.5     | -72.2                             |
| 20  | NPC149962          | -10.8                    | -10.8    | -12.1     | -71.3                             |
| 21  | NPC471850          | -10.7                    | -12.0    | -12.6     | -70.9                             |
| 22  | NPC474581          | -10.6                    | -11.6    | -11.9     | -70.8                             |
| 23  | NPC472437          | -13.5                    | -12.9    | -14.5     | -68.1                             |
| 24  | NPC231271          | -12.4                    | -12.6    | -12.9     | -66.3                             |
| 25  | NPC472937          | -10.3                    | -11.4    | -12.1     | -66.3                             |
| 26  | NPC74086           | -10.5                    | -10.8    | -12.5     | -66.3                             |
| 27  | NPC471583          | -11.8                    | -11.8    | -11.8     | -65.7                             |
| 28  | NPC471858          | -11.5                    | -11.5    | -11.9     | -65.6                             |
| 29  | NPC177362          | -12.0                    | -12.1    | -12.2     | -64.9                             |
| 30  | NPC202104          | -12.6                    | -13.5    | -13.2     | -64.6                             |
| 31  | NPC470601          | -9.6                     | -13.0    | -14.9     | -64.5                             |
| 32  | NPC65118           | -12.2                    | -12.7    | -12.6     | -64.5                             |
| 33  | NPC471859          | -12.1                    | -12.3    | -12.3     | -63.6                             |
| 34  | NPC472934          | -10.7                    | -11.3    | -11.9     | -63.4                             |
| 35  | NPC327962          | -12.2                    | -12.7    | -12.4     | -62.7                             |
| 36  | NPC477531          | -11.0                    | -12.1    | -12.1     | -62.5                             |
| 37  | NPC322800          | -11.2                    | -11.8    | -11.8     | -62.5                             |
| 38  | NPC313179          | -10.9                    | -10.4    | -12.2     | -61.6                             |
| 39  | NPC78159           | -11.3                    | -11.0    | -11.9     | -60.0                             |
| 40  | NPC473547          | -11.9                    | -11.9    | -11.9     | -59.7                             |
| 41  | NPC47905           | -10.8                    | -12.2    | -11.9     | -58.6                             |
| 42  | NPC69383           | -10.9                    | -11.5    | -12.3     | -58.3                             |
| 43  | NPC239990          | -11.9                    | -12.3    | -12.2     | -58.3                             |
| 44  | NPC231712          | -9.3                     | -12.1    | -12.3     | -58.3                             |
| 45  | NPC81137           | -8.8                     | -11.9    | -12.0     | -58.3                             |
| 46  | NPC242269          | -13.2                    | -14.1    | -14.2     | -58.0                             |
| 47  | NPC469671          | -10.3                    | -11.8    | -12.1     | -57.7                             |
| 48  | NPC65034           | -11.9                    | -12.1    | -12.2     | -57.6                             |
| 49  | NPC4638            | -12.2                    | -11.5    | -12.2     | -57.5                             |
| 50  | NPC477874          | -11.7                    | -11.8    | -12.0     | -57.3                             |
| 51  | NPC470426          | -12.8                    | -12.8    | -12.8     | -57.3                             |
| 52  | NPC202428          | -11.2                    | -11.8    | -11.9     | -57.2                             |
| 53  | NPC162440          | -12.2                    | -12.2    | -12.2     | -56.1                             |
| 54  | NPC126676          | -11.8                    | -11.6    | -12.5     | -55.7                             |
| 55  | NPC133209          | -10.8                    | -11.5    | -12.3     | -55.4                             |

**Table S2. Continued.**

| No. | Compound Name/Code | Docking Score (kcal/mol) |          |           | MM-GBSA Binding Energy (kcal/mol) |
|-----|--------------------|--------------------------|----------|-----------|-----------------------------------|
|     |                    | Standard                 | Moderate | Expensive |                                   |
| 56  | NPC266545          | -11.0                    | -10.9    | -12.1     | -55.2                             |
| 57  | NPC473403          | -10.5                    | -12.3    | -12.4     | -55.1                             |
| 58  | NPC475493          | -13.4                    | -13.7    | -13.8     | -54.1                             |
| 59  | NPC469447          | -12.1                    | -12.4    | -12.3     | -54.0                             |
| 60  | NPC96605           | -8.5                     | -10.6    | -11.9     | -53.9                             |
| 61  | NPC224528          | -12.3                    | -12.6    | -12.8     | -53.7                             |
| 62  | NPC105942          | -11.5                    | -12.0    | -12.1     | -53.4                             |
| 63  | NPC472395          | -11.9                    | -12.1    | -12.9     | -53.1                             |
| 64  | NPC471863          | -12.1                    | -11.9    | -11.9     | -52.6                             |
| 65  | NPC472236          | -11.2                    | -12.4    | -12.4     | -52.4                             |
| 66  | NPC183736          | -10.9                    | -12.3    | -12.5     | -52.3                             |
| 67  | NPC472371          | -12.4                    | -12.6    | -12.1     | -52.1                             |
| 68  | NPC473507          | -10.1                    | -11.5    | -12.9     | -51.7                             |
| 69  | NPC270958          | -10.2                    | -11.4    | -12.0     | -51.4                             |
| 70  | NPC475258          | -12.7                    | -12.7    | -12.7     | -50.7                             |
| 71  | NPC475570          | -11.7                    | -11.8    | -11.8     | -50.3                             |
| 72  | NPC103250          | -12.0                    | -12.1    | -12.1     | -50.1                             |
| 73  | NPC307205          | -12.4                    | -12.4    | -12.4     | -50.0                             |
| 74  | NPC473612          | -11.7                    | -12.0    | -12.0     | -49.9                             |
| 75  | NPC36754           | -12.0                    | -12.0    | -12.0     | -49.3                             |
| 76  | NPC473720          | -11.8                    | -11.9    | -11.9     | -48.6                             |
| 77  | NPC143173          | -12.0                    | -12.0    | -12.0     | -48.1                             |
| 78  | NPC250835          | -12.2                    | -12.2    | -12.2     | -47.9                             |
| 79  | NPC6702            | -12.0                    | -12.5    | -12.7     | -47.1                             |
| 80  | NPC94531           | -11.0                    | -11.5    | -11.8     | -46.9                             |
| 81  | NPC475520          | -11.9                    | -11.8    | -11.9     | -46.8                             |
| 82  | NPC477207          | -11.9                    | -12.5    | -12.6     | -46.5                             |
| 83  | NPC208011          | -11.0                    | -10.9    | -12.1     | -45.2                             |
| 84  | NPC127197          | -12.0                    | -12.0    | -12.0     | -43.0                             |
| 85  | NPC9856            | -11.8                    | -11.8    | -11.8     | -40.4                             |
| 86  | NPC470602          | -10.9                    | -13.0    | -14.7     | -22.6                             |

<sup>a</sup>Data ranked based on the MM-GBSA binding energy over the 1 ns implicit MD simulations.
